# Supplementary material
Source: Springer Nature journal article supplement (https://www.springermedizin.de/resource/supplementary/12967_2009_346_MOESM3_ESM.pdf/9576268)

**A**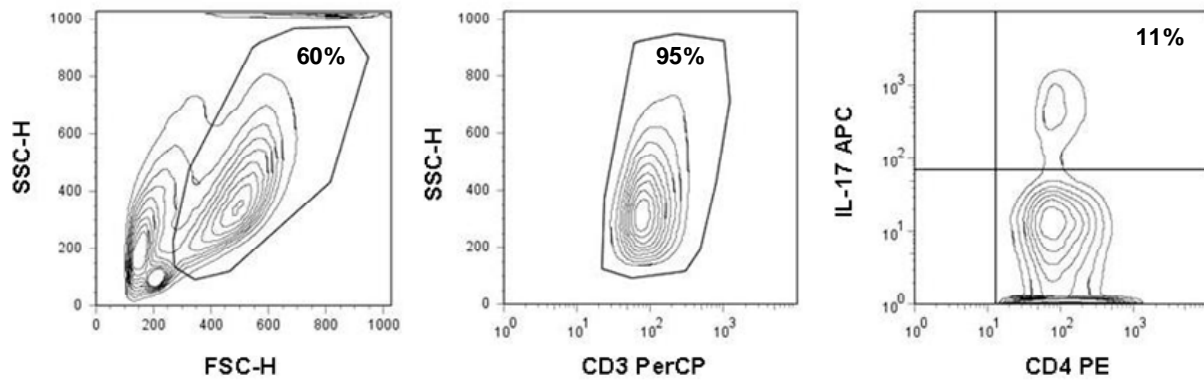**B**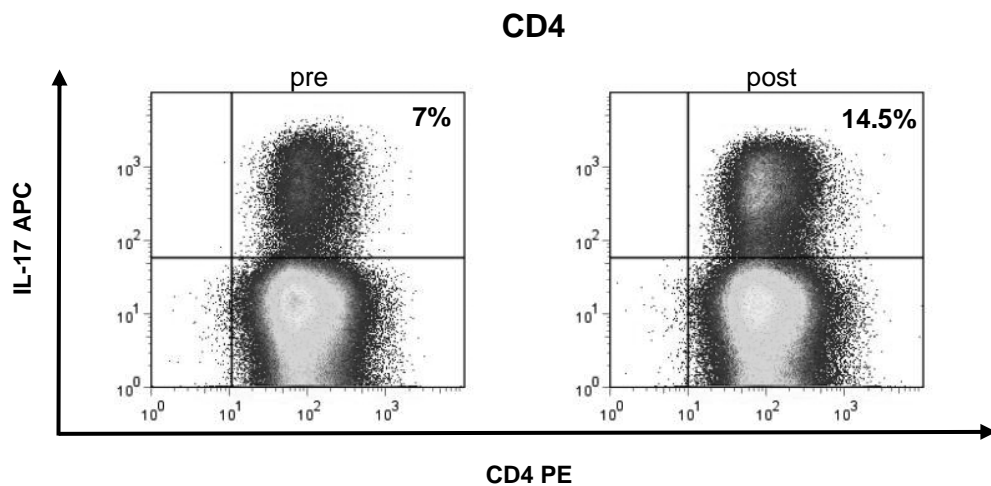**C**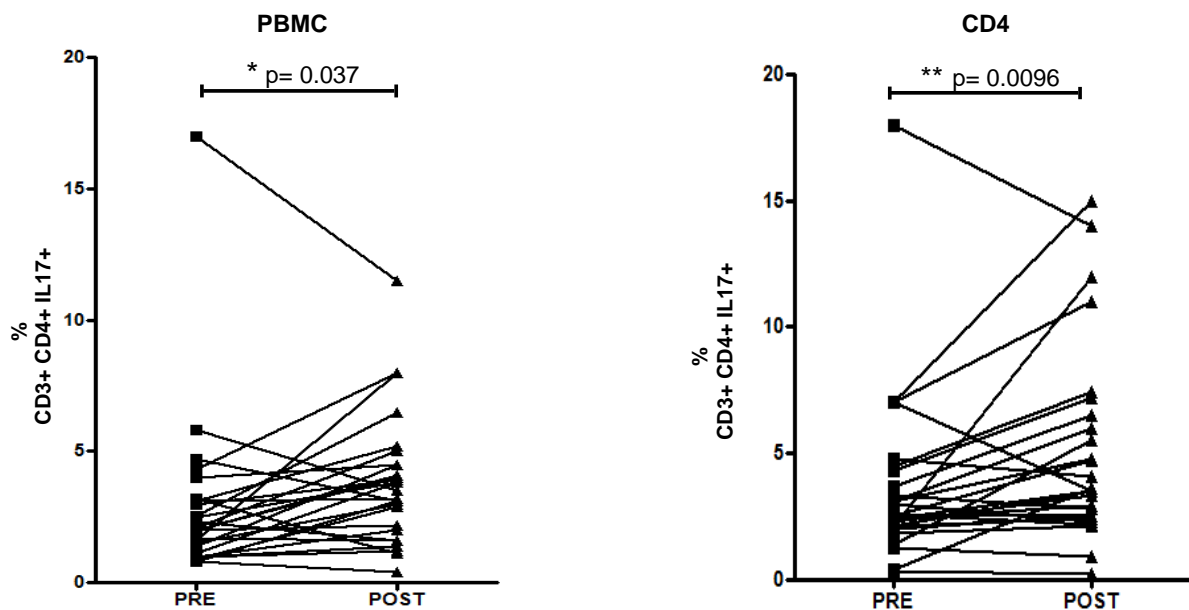

Supplement: MOESM3 [file 9576268]
